# Supplementary material for: Diet Quality and Risk of Parkinson’s Disease: The Rotterdam Study
Source: MDPI journal article supplement (doi:10.3390/nu13113970), 2021-11-07
Supplement: s1 [file s1]

## Supplementary Tables: Diet Quality and risk of Parkinson's disease: the Rotterdam study

**Table S1.** Description of the food groups.

| Food Group                      | Included food Products                                                                                                                            |
|---------------------------------|---------------------------------------------------------------------------------------------------------------------------------------------------|
| Vegetables                      | Raw and boiled vegetables, pickled vegetables, raw salads, mushrooms, onions and garlic                                                           |
| Fruits                          | Fresh fruits                                                                                                                                      |
| Legumes                         | Beans, lentils and legume soup                                                                                                                    |
| Milk and cream                  | All-fat-milk, chocolate milk, coffee creamer and cream                                                                                            |
| Yoghurt and fermented milk      | All-fat-yoghurt, buttermilk, fruit-yoghurt and quark                                                                                              |
| Eggs                            | Boiled eggs and baked eggs                                                                                                                        |
| Cheese                          | Cheese and cheese spread                                                                                                                          |
| Unprocessed white meat          | Chicken                                                                                                                                           |
| Processed and red meat          | Pork, beef, minced beef, horse meat, lamb, hamburger, sausages, ham, liver and bacon                                                              |
| Fish and seafood                | Herring, white fish, salmon, seafood, sardines, tuna and fish fingers                                                                             |
| Vegetable oils and spreads      | Peanut oil, margarine, soy-oil, half-fat margarine, safflower-oil and olive-oil                                                                   |
| Animal-based fats               | Dairy butter, frying fat, baking fat, lard and other fats                                                                                         |
| Wholegrain products             | Wheat germs, brown bread, wheat bread, oat flakes, muesli, brown rice, spelt, wholegrain pasta, wholegrain cereals and porridge with wholegrains. |
| Refined grain products          | Cornflakes, currant-bread, gingerbread, Dutch rusk, white bread, pancakes, white rice, pasta, crackers and croissants                             |
| Potatoes and fries              | Cooked potatoes, mashed potatoes, fries and oven fries                                                                                            |
| Sugar-containing beverages      | Soda, diet soda, all fruit juices, lemonade, alcohol free beer and vegetable juices                                                               |
| Tea                             | Tea                                                                                                                                               |
| Coffee                          | Coffee                                                                                                                                            |
| Alcoholic beverages             | Wine, beer, gin, sherry and other liquors                                                                                                         |
| Savory snacks                   | Salted biscuits, crispy nuts and other salty snacks                                                                                               |
| Sweet snacks                    | Pies, cakes, biscuits, chocolate, sugar, acid drops, licorice and candy bars                                                                      |
| Nuts and seeds                  | Linseeds, unsalted nuts, salted peanuts, other seeds                                                                                              |
| Soy products and meat replacers | Tofu, tempeh, soy chunks, soy drink, soy yoghurt, meat replacers                                                                                  |

**Table S2:** Time-stratified analyses for association between dietary patterns and Parkinson's disease.

|                           | <b>Total No. of Incident<br/>Parkinson's Disease</b> | <b>Basic Model<br/>HR (95% CI)</b> | <b>Covariate Model<br/>HR (95% CI)</b> |
|---------------------------|------------------------------------------------------|------------------------------------|----------------------------------------|
| Dutch diet quality score  |                                                      |                                    |                                        |
| Follow-up 0–5 years       | 40                                                   | 0.99 (0.70–1.40)                   | 0.98 (0.68–1.39)                       |
| Follow-up 0–10 years      | 78                                                   | 0.93 (0.73–1.18)                   | 0.92 (0.72–1.17)                       |
| Follow-up 0–15 years      | 101                                                  | 0.95 (0.77–1.17)                   | 0.92 (0.75–1.14)                       |
| Mediterranean diet score  |                                                      |                                    |                                        |
| Follow-up 0–5 years       | 40                                                   | 1.07 (0.75–1.53)                   | 1.06 (0.73–1.54)                       |
| Follow-up 0–10 years      | 78                                                   | 0.97 (0.76–1.23)                   | 0.96 (0.75–1.22)                       |
| Follow-up 0–15 years      | 101                                                  | 1.00 (0.81–1.23)                   | 0.97 (0.78–1.20)                       |
| Prudent pattern           |                                                      |                                    |                                        |
| Follow-up 0–5 years       | 40                                                   | 1.20 (0.79–1.83)                   | 1.24 (0.79–1.93)                       |
| Follow-up 0–10 years      | 78                                                   | 0.98 (0.72–1.35)                   | 1.00 (0.71–1.42)                       |
| Follow-up 0–15 years      | 101                                                  | 0.94 (0.71–1.25)                   | 0.92 (0.67–1.26)                       |
| Unhealthy pattern         |                                                      |                                    |                                        |
| Follow-up 0–5 years       | 40                                                   | 1.01 (0.68–1.51)                   | 1.05 (0.69–1.61)                       |
| Follow-up 0–10 years      | 78                                                   | 0.99 (0.76–1.29)                   | 1.02 (0.77–1.35)                       |
| Follow-up 0–15 years      | 101                                                  | 0.95 (0.76–1.20)                   | 1.01 (0.79–1.29)                       |
| Traditional Dutch pattern |                                                      |                                    |                                        |
| Follow-up 0–5 years       | 40                                                   | 0.89 (0.61–1.29)                   | 0.82 (0.50–1.36)                       |
| Follow-up 0–10 years      | 78                                                   | 0.89 (0.69–1.15)                   | 0.84 (0.60–1.19)                       |
| Follow-up 0–15 years      | 101                                                  | 0.91 (0.73–1.14)                   | 0.83 (0.62–1.13)                       |

The hazard ratios (HR) and 95% confidence interval (CI), obtained using Cox Proportional Hazard models, are shown per standard deviation (SD) for the dietary patterns and scores. The basic model was adjusted for sex, age at baseline and Rotterdam Study cohort. The covariate model was adjusted for all items in the basic model and additionally for body mass index (BMI), education, smoking behavior and energy intake.

**Table S3:** Analyses per cohort for association between dietary patterns and Parkinson's disease.

|                           | No. of Incident Parkinson's<br>Disease/No. of Participants in Cohort | Basic Model<br>HR (95%CI) | Covariate Model<br>HR (95% CI) |
|---------------------------|----------------------------------------------------------------------|---------------------------|--------------------------------|
| Dutch diet quality score  |                                                                      |                           |                                |
| RS-I                      | 101/5250                                                             | 0.99 (0.80–1.22)          | 0.95 (0.77–1.18)               |
| RS-II                     | 16/1601                                                              | 0.91 (0.51–1.61)          | 0.92 (0.51–1.67) <sup>a</sup>  |
| RS-III                    | 12/2563                                                              | 0.91 (0.46–1.82)          | 0.96 (0.45–2.05) <sup>a</sup>  |
| Mediterranean diet score  |                                                                      |                           |                                |
| RS-I                      | 101/5250                                                             | 0.99 (0.80–1.24)          | 0.94 (0.75–1.18)               |
| RS-II                     | 16/1601                                                              | 0.78 (0.49–1.26)          | 0.79 (0.48–1.29) <sup>a</sup>  |
| RS-III                    | 12/2563                                                              | 0.88 (0.49–1.59)          | 0.95 (0.48–1.88) <sup>a</sup>  |
| Prudent pattern           |                                                                      |                           |                                |
| RS-I                      | 101/5250                                                             | 0.87 (0.62–1.23)          | 0.77 (0.53–1.12)               |
| RS-II                     | 16/1601                                                              | 0.84 (0.41–1.71)          | 0.90 (0.41–1.98) <sup>a</sup>  |
| RS-III                    | 12/2563                                                              | 0.90 (0.48–1.68)          | 1.07 (0.47–2.41) <sup>a</sup>  |
| Unhealthy pattern         |                                                                      |                           |                                |
| RS-I                      | 101/5250                                                             | 0.93 (0.72–1.19)          | 0.98 (0.76–1.27)               |
| RS-II                     | 16/1601                                                              | 1.15 (0.71–1.87)          | 1.20 (0.71–2.03) <sup>a</sup>  |
| RS-III                    | 12/2563                                                              | 0.94 (0.51–1.73)          | 0.92 (0.46–1.84) <sup>a</sup>  |
| Traditional Dutch pattern |                                                                      |                           |                                |
| RS-I                      | 101/5250                                                             | 1.13 (0.91–1.42)          | 0.97 (0.71–1.32)               |
| RS-II                     | 16/1601                                                              | 0.67 (0.37–1.23)          | 0.63 (0.29–1.36) <sup>a</sup>  |
| RS-III                    | 12/2563                                                              | 0.70 (0.34–1.46)          | 0.71 (0.23–2.23) <sup>a</sup>  |

The hazard ratios (HR) and 95% confidence interval (CI), obtained using Cox Proportional Hazard models, are shown per standard deviation (SD) for the dietary patterns and scores. The basic model was adjusted for sex, age at baseline and Rotterdam Study cohort. The covariate model was adjusted for all items in the basic model and additionally for body mass index (BMI), education, smoking behavior and energy intake. <sup>a</sup>Due to an overfit model this covariate model was adjusted for all items in the basic model and additionally BMI and energy intake, but not for education and smoking behavior.

**Table S4:** Sex-stratified analyses for association between dietary patterns and Parkinson's disease.

|                           | No. of Incident Parkinson's Disease/No.<br>of Participants in Cohort | Basic Model<br>HR (95%CI) | Covariate Model<br>HR (95% CI) |
|---------------------------|----------------------------------------------------------------------|---------------------------|--------------------------------|
| Dutch diet quality score  |                                                                      |                           |                                |
| Female                    | 61/5439                                                              | 1.14 (0.88–1.49)          | 1.05 (0.81–1.38)               |
| Male                      | 68/3975                                                              | 0.82 (0.63–1.06)          | 0.80 (0.61–1.04)               |
| Mediterranean diet score  |                                                                      |                           |                                |
| Female                    | 61/5439                                                              | 1.02 (0.76–1.38)          | 0.93 (0.69–1.25)               |
| Male                      | 68/3975                                                              | 0.87 (0.69–1.10)          | 0.86 (0.67–1.10)               |
| Prudent pattern           |                                                                      |                           |                                |
| Female                    | 61/5439                                                              | 0.97 (0.65–1.44)          | 0.78 (0.50–1.23)               |
| Male                      | 68/3975                                                              | 0.81 (0.57–1.16)          | 0.83 (0.56–1.22)               |
| Traditional Dutch pattern |                                                                      |                           |                                |
| Female                    | 61/5439                                                              | 1.36 (1.01–1.84)          | 1.13 (0.73–1.74)               |
| Male                      | 68/3975                                                              | 0.83 (0.64–1.07)          | 0.80 (0.57–1.13)               |
| Unhealthy pattern         |                                                                      |                           |                                |
| Female                    | 61/5439                                                              | 0.85 (0.6–1.19)           | 0.94 (0.67–1.32)               |
| Male                      | 68/3975                                                              | 1.08 (0.83–1.39)          | 1.13 (0.86–1.49)               |

The hazard ratios (HR) and 95% confidence interval (CI), obtained using Cox Proportional Hazard models, are shown per standard deviation (SD) increase for the dietary patterns and scores. The basic model was adjusted for sex, age at baseline and Rotterdam Study cohort. The covariate model was adjusted for all items in the basic model and additionally for body mass index (BMI), education, smoking behavior and energy intake.

**Table S5:** Associations between dietary patterns and risk of parkinsonism ( $n = 9414$ ).

| <b>Dietary Pattern</b>            | <b>No. of Incident Parkinsonism <sup>a</sup></b> | <b>Basic Model<br/>HR (95% CI)</b> | <b>Covariate Model<br/>HR (95% CI)</b> |
|-----------------------------------|--------------------------------------------------|------------------------------------|----------------------------------------|
| Dutch diet quality score per SD   | 254                                              | 0.97 (0.85–1.10)                   | 0.95 (0.83–1.08)                       |
| Tertiles                          |                                                  |                                    |                                        |
| Low (reference)                   | 71                                               | 1                                  | 1                                      |
| Medium                            | 95                                               | 1.04 (0.76–1.42)                   | 1.01 (0.74–1.39)                       |
| High                              | 88                                               | 1.10 (0.80–1.53)                   | 1.05 (0.75–1.46)                       |
| Mediterranean diet score per SD   | 254                                              | 0.88 (0.78–1.01)                   | 0.86 (0.76–0.98)                       |
| Tertiles                          |                                                  |                                    |                                        |
| Low (reference)                   | 89                                               | 1                                  | 1                                      |
| Medium                            | 102                                              | 1.06 (0.79–1.41)                   | 1.03 (0.77–1.38)                       |
| High                              | 63                                               | 0.71 (0.51–0.98)                   | 0.67 (0.48–0.94)                       |
| Prudent pattern, per SD           | 254                                              | 0.79 (0.64–0.96)                   | 0.76 (0.61–0.95)                       |
| Tertiles                          |                                                  |                                    |                                        |
| Low (reference)                   | 115                                              | 1                                  | 1                                      |
| Medium                            | 93                                               | 0.89 (0.67–1.18)                   | 0.88 (0.67–1.17)                       |
| High                              | 46                                               | 0.75 (0.52–1.08)                   | 0.74 (0.50–1.08)                       |
| Unhealthy pattern, per SD         | 254                                              | 1.00 (0.86–1.15)                   | 1.05 (0.90–1.22)                       |
| Tertiles                          |                                                  |                                    |                                        |
| Low (reference)                   | 80                                               | 1                                  | 1                                      |
| Medium                            | 102                                              | 1.26 (0.94–1.69)                   | 1.32 (0.98–1.78)                       |
| High                              | 72                                               | 1.07 (0.76–1.50)                   | 1.17 (0.83–1.66)                       |
| Traditional Dutch pattern, per SD | 254                                              | 0.99 (0.86–1.13)                   | 0.99 (0.82–1.20)                       |
| Tertiles                          |                                                  |                                    |                                        |
| Low (reference)                   | 63                                               | 1                                  | 1                                      |
| Medium                            | 96                                               | 1.24 (0.89–1.71)                   | 1.26 (0.90–1.77)                       |
| High                              | 95                                               | 1.10 (0.78–1.55)                   | 1.15 (0.76–1.73)                       |

The hazard ratios (HR) and 95% confidence interval (CI), obtained using Cox Proportional Hazard models, are per standard deviation (SD) increase for the dietary patterns and scores. The basic model was adjusted for sex, age at baseline and Rotterdam Study cohort. The covariate model was adjusted for all items in the basic model and additionally for body mass index (BMI), education, smoking behavior and energy intake. <sup>a</sup> Parkinsonism includes: PD, drug-induced parkinsonism, vascular parkinsonism, Lewy Body disease, parkinsonism with dementia other than Lewy Body disease, multi system atrophy, progressive supranuclear palsy, corticobasal degeneration or parkinsonism resulting from a tumor.
